# Supplementary material for: Promoting the uptake of chloride ions by ZnCo–Cl layered double hydroxide electrodes for enhanced capacitive deionization
Source: Royal Society of Chemistry journal article supplement (doi:10.1039/d1en00350j), 2021-01-01
Supplement: d1en00350j1.pdf [file d1en00350j1.pdf]

**Promoting the Chloride Ions Uptake by ZnCo-Cl Layered Double  
Hydroxide Electrodes towards the Enhanced Capacitive Deionization**

Zehao Zhang, Haibo Li \*

Ningxia Key Laboratory of Photovoltaic Materials, Ningxia University, Yinchuan,  
Ningxia, 750021, P. R. China

\*Corresponding author. Fax/Tel: +86 0951 2062414; E-mail: lihaibo@nxu.edu.cn  
(Haibo Li),

**Fig. S1**

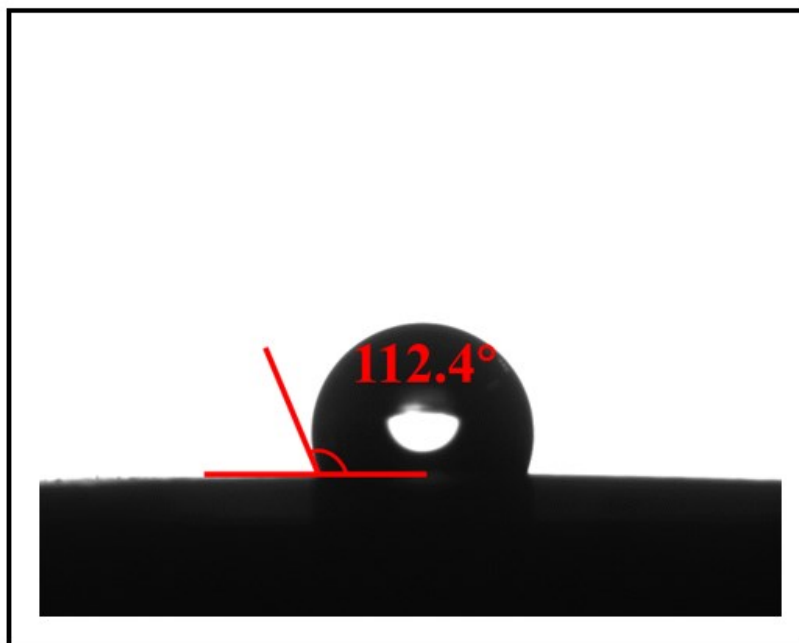

**Figure S1** The water contact angle image of ZnCo-Cl LDH.

**Fig. S2**

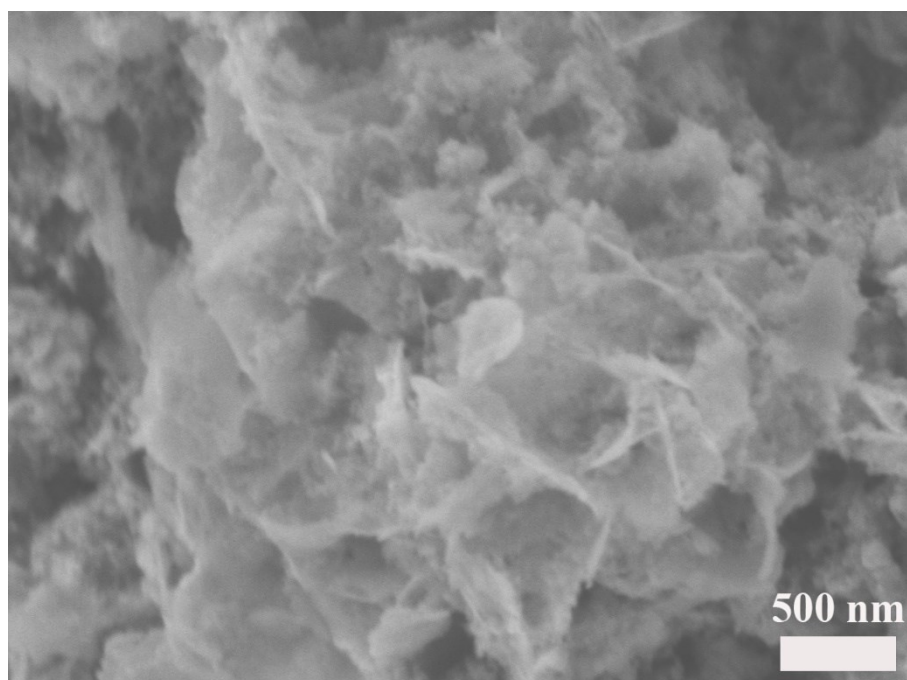

**Figure S2** SEM images of the ZnCo-Cl LDH electrode after the desalting.

**Fig. S3**

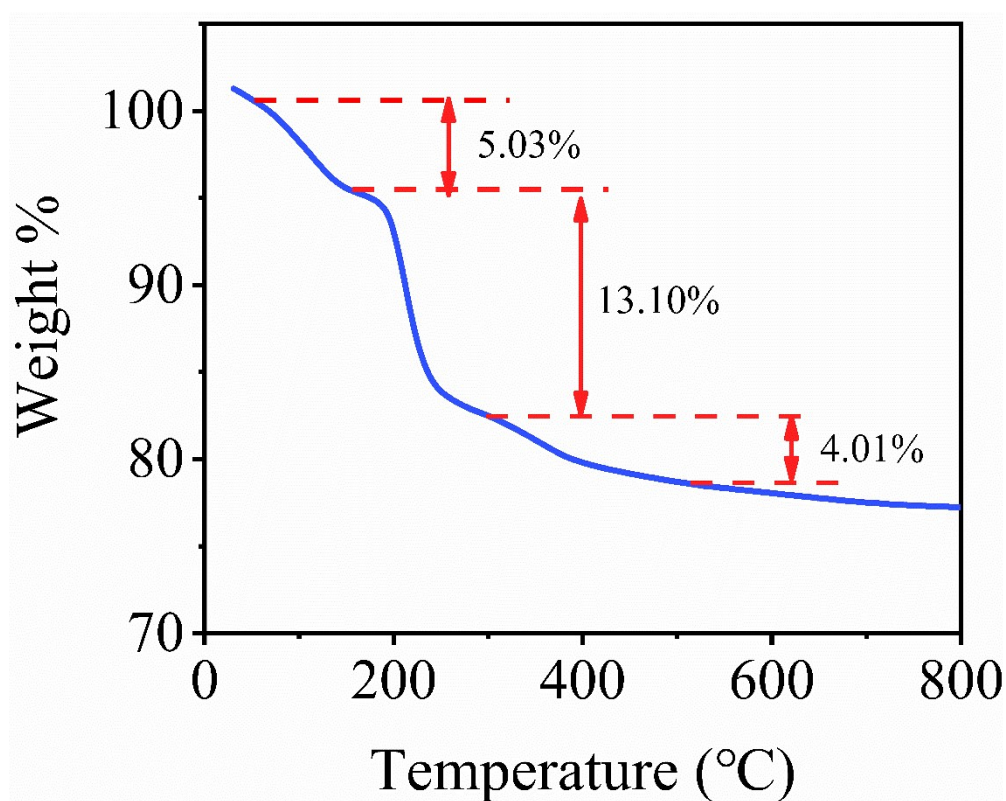

**Figure S3** TGA curve of the ZnCo-Cl LDH in air.
